# Supplementary material for: Formation of molecular glasses and the aggregation in solutions for lanthanum(iii), calcium(ii), and yttrium(iii) complexes of octanoyl-dl-alaninate
Source: Royal Society of Chemistry journal article supplement (doi:10.1039/b713768k), 2008-01-01
Supplement: b713768k-s2.pdf [file b713768k-s2.pdf]

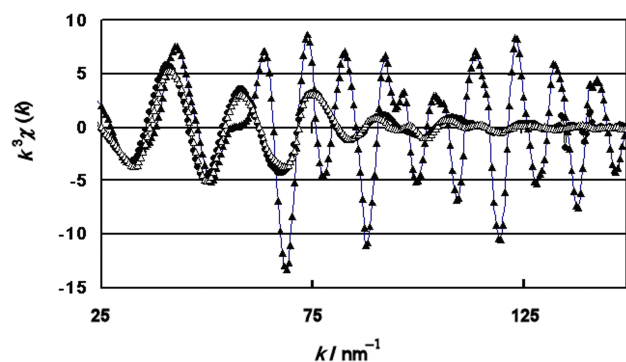

(a) Yttrium compounds

- ▲  $\text{Y}_2\text{O}_3$
- $\text{Y}(\text{oct-ala})_3\text{H}_2\text{O}$  glassy
- △  $\text{Y}(\text{oct-ala})_3\text{H}_2\text{O}$  crystalline

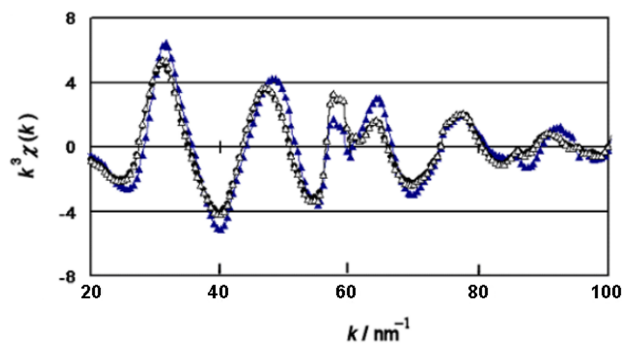

(b) Lanthanum compounds

- ▲  $\text{La}(\text{acac})_3 \cdot 2\text{H}_2\text{O}$
- $\text{La}(\text{oct-ala})_3 \cdot \text{H}_2\text{O}$  glassy
- △  $\text{La}(\text{oct-ala})_3 \cdot \text{H}_2\text{O}$  crystalline
