# Supplementary material for: Formation of molecular glasses and the aggregation in solutions for lanthanum(iii), calcium(ii), and yttrium(iii) complexes of octanoyl-dl-alaninate
Source: Royal Society of Chemistry journal article supplement (doi:10.1039/b713768k), 2008-01-01
Supplement: b713768k-s4.pdf [file b713768k-s4.pdf]

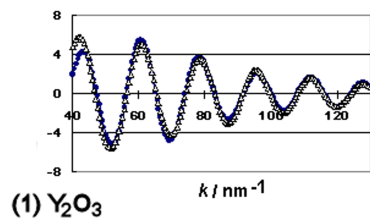

(1)  $\text{Y}_2\text{O}_3$

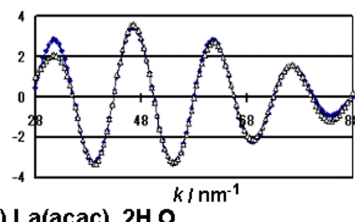

(1)  $\text{La}(\text{acac})_3 \cdot 2\text{H}_2\text{O}$

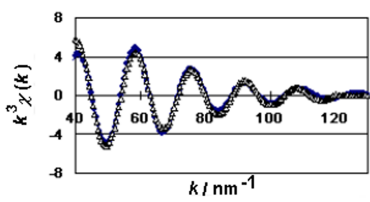

(2)  $\text{Y}(\text{oct-ala})_3 \cdot \text{H}_2\text{O}$  glassy

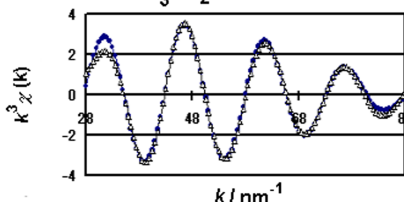

(2)  $\text{La}(\text{oct-ala})_3 \cdot \text{H}_2\text{O}$  glassy

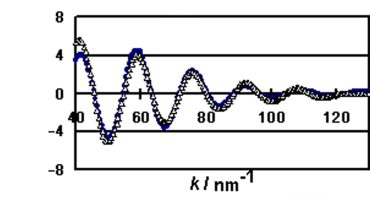

(3)  $\text{Y}(\text{oct-ala})_3 \cdot 2\text{H}_2\text{O}$  crystalline

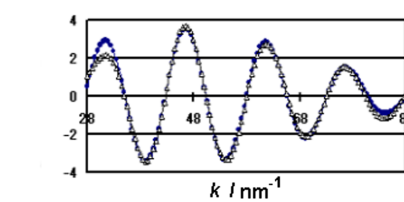

(3)  $\text{La}(\text{oct-ala})_3 \cdot \text{H}_2\text{O}$  crystalline

(a) Yttrium compounds

(b) Lanthanum compounds
