# Supplementary figures and images for: Formation of molecular glasses and the aggregation in solutions for lanthanum(iii), calcium(ii), and yttrium(iii) complexes of octanoyl-dl-alaninate
Source: Royal Society of Chemistry journal article supplement (doi:10.1039/b713768k), 2008-01-01

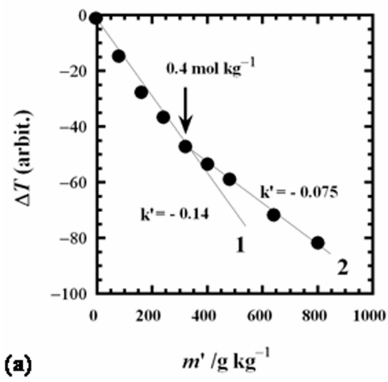

(a)

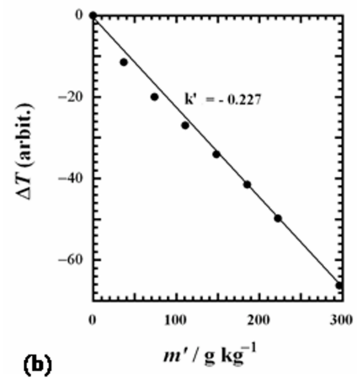

(b)

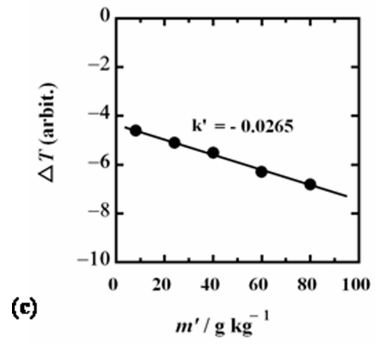

(c)

Supplement: b713768k-s1.pdf [file b713768k-s1.pdf]

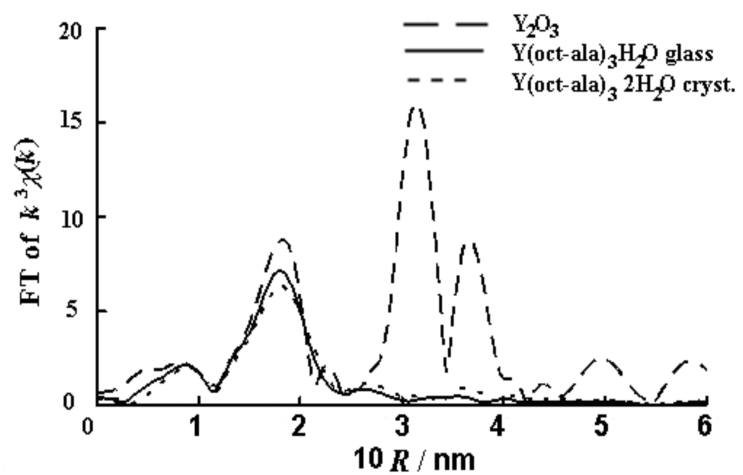

(a)

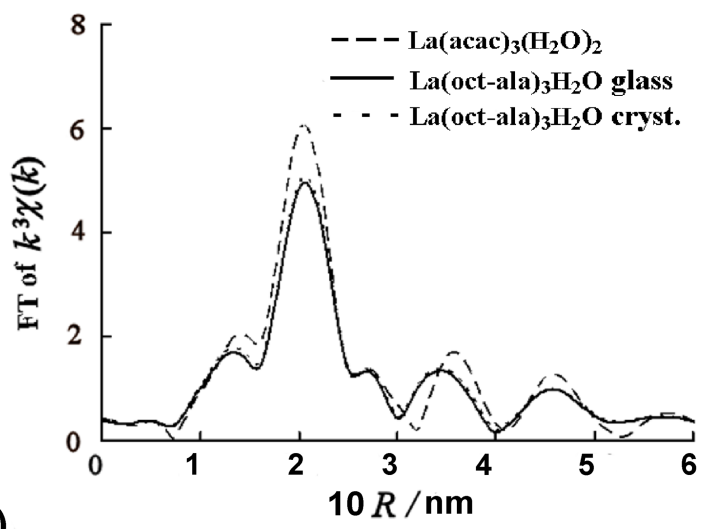

(b)

Supplement: b713768k-s3.pdf [file b713768k-s3.pdf]
